# Supplementary material for: Development of a SARS-CoV-2 Vaccine Candidate Using Plant-Based Manufacturing and a Tobacco Mosaic Virus-like Nano-Particle
Source: MDPI journal article supplement (doi:10.3390/vaccines9111347), 2021-11-17
Supplement: s1 [file s1]

**Development of a SARS-CoV-2 vaccine candidate using plant-based manufacturing and a tobacco mosaic virus-like nanoparticle**

**Supplementary Materials**

figure S1. Sedimentation coefficient distribution for TMV NtK and CoV-RBD121-NP.

figure S2. Analysis of IFN $\gamma$ -producing cells from spleens of mice receiving CoV-RBD121 or the unadjuvanted or adjuvanted formulations of CoV-RBD121-NP.

**Supplementary figures**

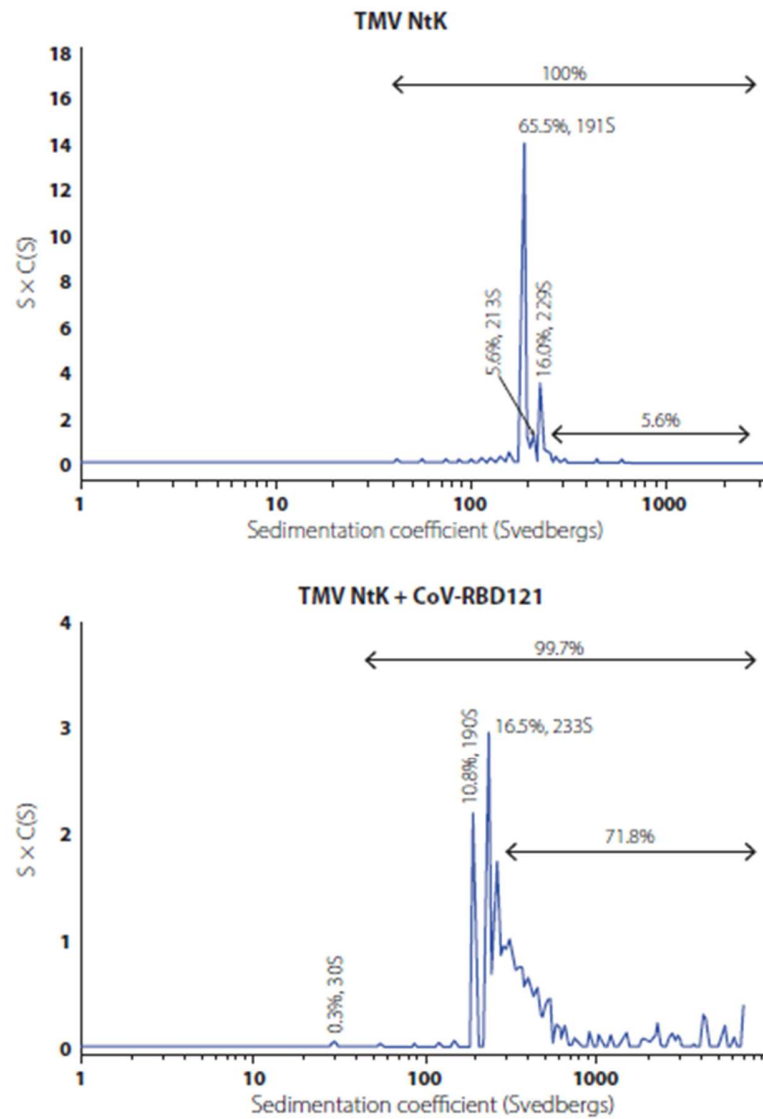

**figure S1. Sedimentation coefficient distribution for TMV NtK and CoV-RBD121-NP.** Data are from ultracentrifugation of a sample of TMV NtK before conjugation to the antigen and after conjugation to COV-RBD121.

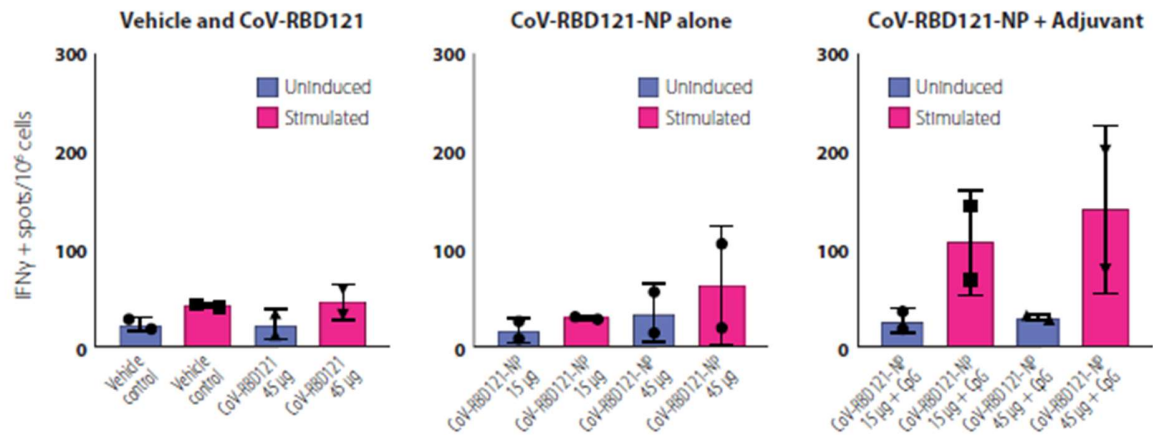

**figure S2. Analysis of IFN $\gamma$ -producing cells from spleens of mice receiving CoV-RBD121 or the unadjuvanted or adjuvanted formulations of CoV-RBD121-NP.** Data show the results of ELISpot assay from the cells from the spleens of both mice harvested from each treatment group. Stimulated indicates that the cells were incubated with S1-HIS protein to detect a response to the RBD. Uninduced cells were not exposed to S1-His and represent the background number of IFN $\gamma$ -positive cells.
